# Supplementary material for: Robust handling of extremes in quantile mapping – "Murder your darlings"
Source: Copernicus journal article supplement (doi:10.5194/gmd-2024-98), 2024-06-19

Diff to ref data

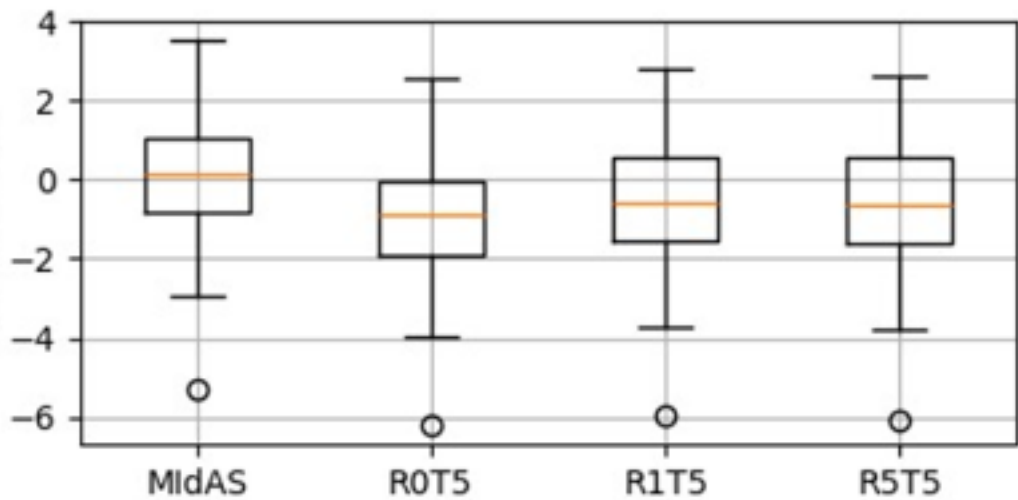

Supplement: Supplementary file [file gmd-2024-98-AC3-supplement.pdf]
